# Supplementary material for: Ribosome surface properties may impose limits on the nature of the cytoplasmic proteome
Source: eLife journal article supplement (doi:10.7554/elife.30084), 2017-11-20
Supplement: supp [file elife-30084-supp-v1.zip]

Archive with 9 entries (9 files):
- elife_poa_e30084_Figure_6_figure_supplement_1_source_data_1.docx
- elife_poa_e30084_Supplementary_File_1.docx
- elife_poa_e30084_Figure_7_figure_supplement_2.pdf
- elife_poa_e30084_Figure_7_figure_supplement_1.pdf
- elife_poa_e30084_Figure_4_figure_supplement_1.pdf
- elife_poa_e30084_Figure_4_figure_supplement_2.pdf
- elife_poa_e30084_Transparent_Reporting_File.docx
- elife_poa_e30084_Figure_2_figure_supplement_1.pdf
- elife_poa_e30084_Figure_6_figure_supplement_1.pdf
