# Supplementary material for: Ribosome surface properties may impose limits on the nature of the cytoplasmic proteome
Source: eLife journal article supplement (doi:10.7554/elife.30084), 2017-11-20

a)

Homogeneous

Somewhat heterogeneous

Very heterogeneous

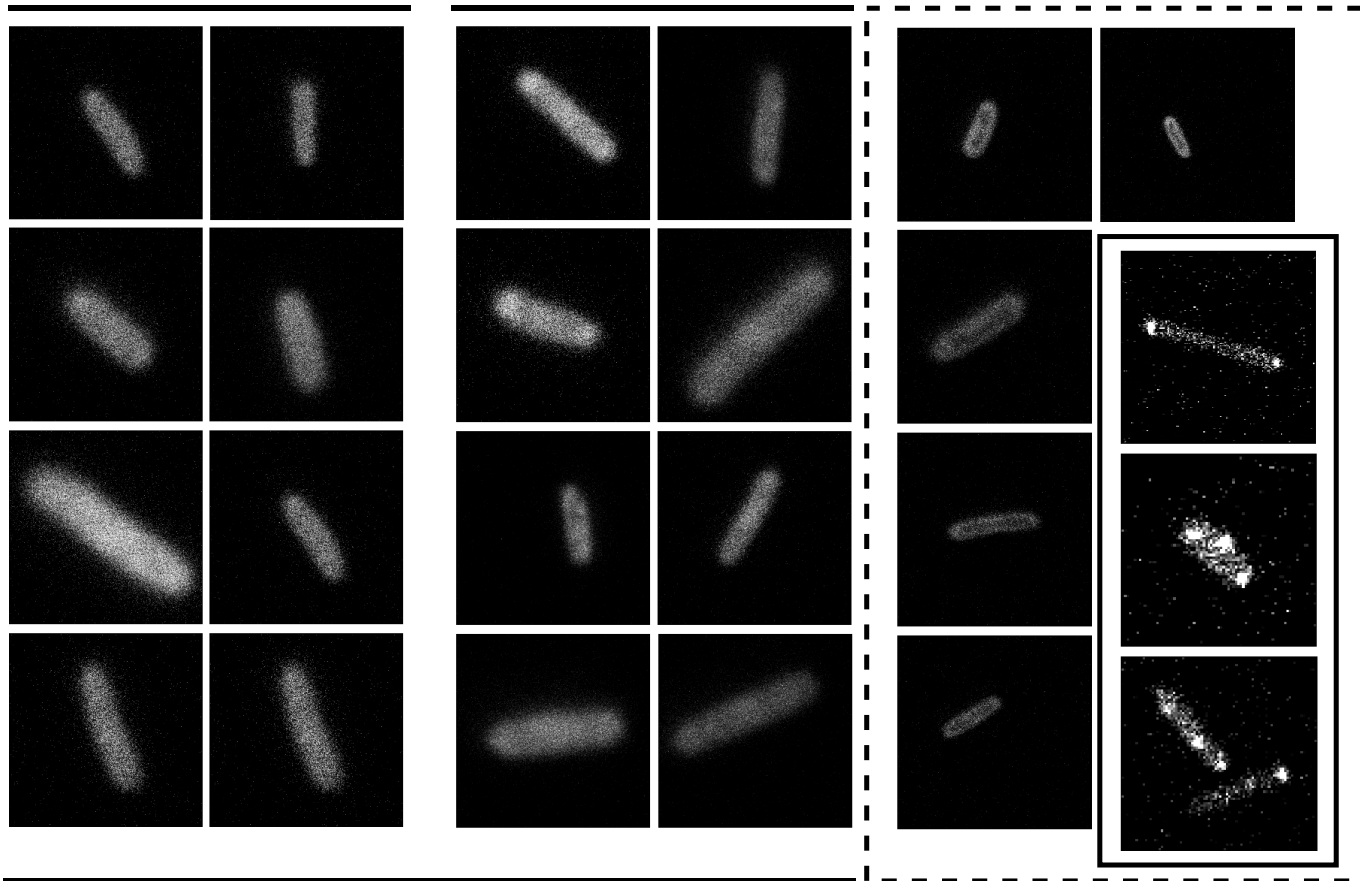

Included in the FRAP measurement

Not included

b)

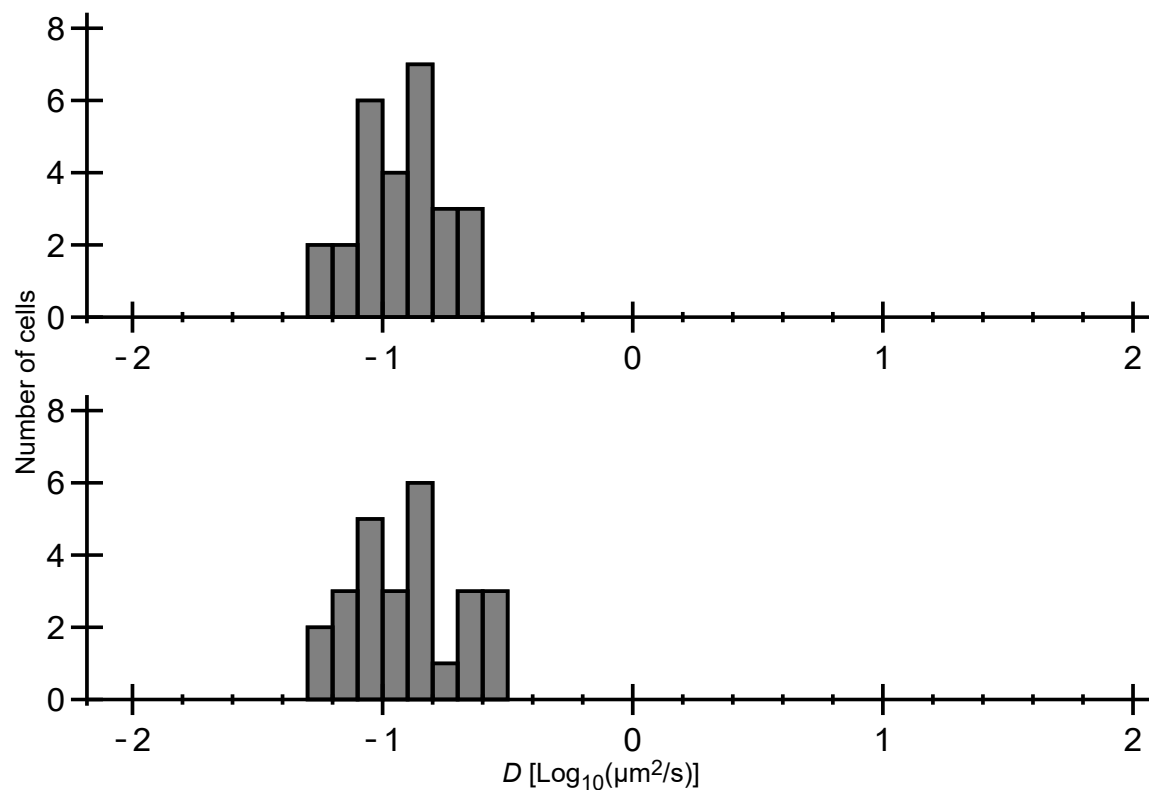

Supplement: supp [file elife-30084-supp-v1.zip › elife_poa_e30084_Figure_2_figure_supplement_1.pdf]
