# Supplementary material for: Ribosome surface properties may impose limits on the nature of the cytoplasmic proteome
Source: eLife journal article supplement (doi:10.7554/elife.30084), 2017-11-20
Supplement: supp [file elife-30084-supp-v1.zip › elife_poa_e30084_Figure_6_figure_supplement_1_source_data_1.docx]

**Figure 6-figure supplement 1 source data: Free fraction of GFP variants in *E. coli*, *L. lactis* and *Hfx. volcanii*.**

| Organism | GFP variant | Mean D (µm2/s) | Free fraction |
| --- | --- | --- | --- |
| *E. coli* | -30 | 11 | 1 |
| -7 | 10 | 1 |
| 0 | 10 | 1 |
| +7 | 2.6 | 0.26 |
| +11a | 0.76 | 0.072 |
| +11b | 2.7 | 0.27 |
| +15 | 1.5 | 0.15 |
| +25 | 0.14 | 0.010 |
| *L. lactis* | -7 | 6.2 | 1 |
| +15 | 2.3 | 0.37 |
| +25 | 0.61 | 0.093 |
| *Hfx. volcanii* | -30 | 10 | 1 |
| -7 | 5.5 | 0.55 |
| +15 | 2.9 | 0.29 |
| +25 | 1.9 | 0.19 |
