# Supplementary figures and images for: Ribosome surface properties may impose limits on the nature of the cytoplasmic proteome
Source: eLife journal article supplement (doi:10.7554/elife.30084), 2017-11-20

Whole genome

Cytoplasmic

Number of genes

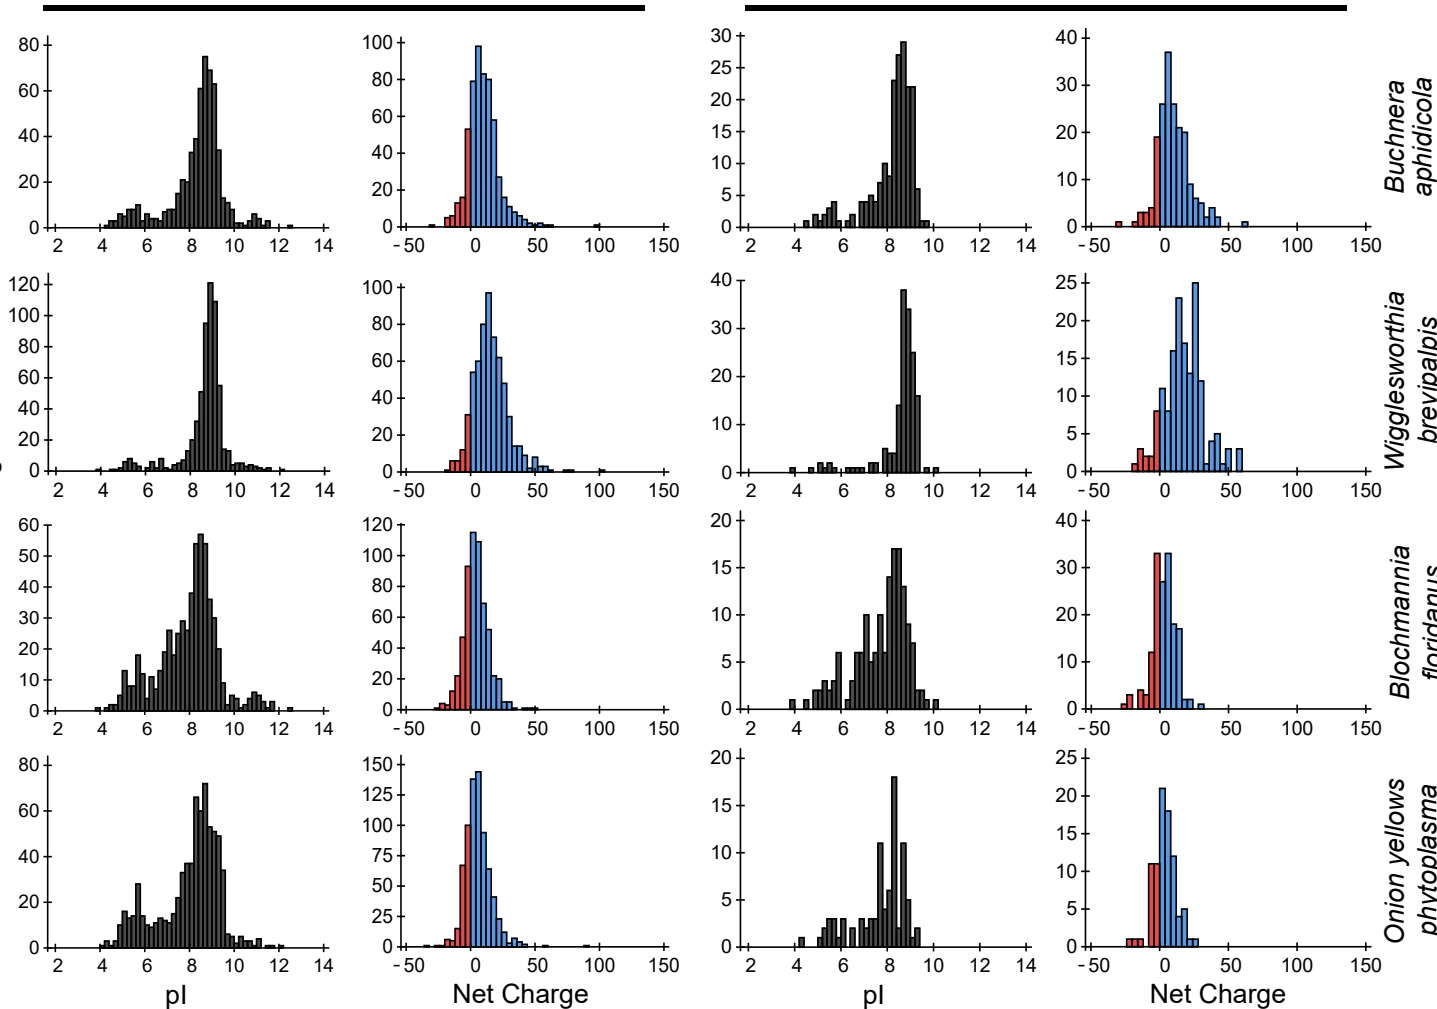

Supplement: supp [file elife-30084-supp-v1.zip › elife_poa_e30084_Figure_7_figure_supplement_2.pdf]

a)

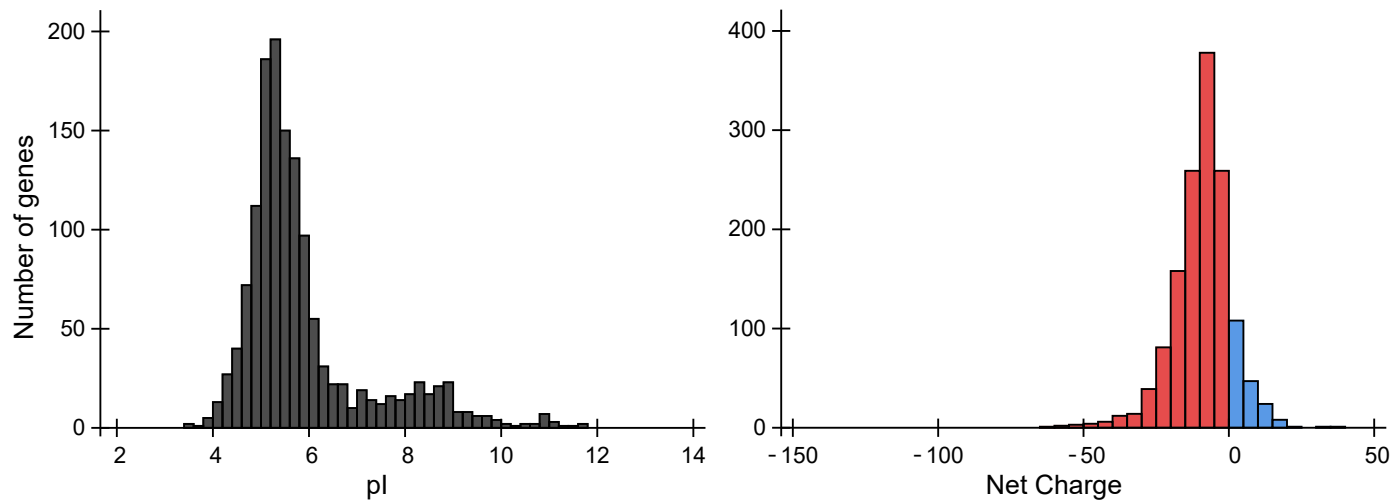

b)

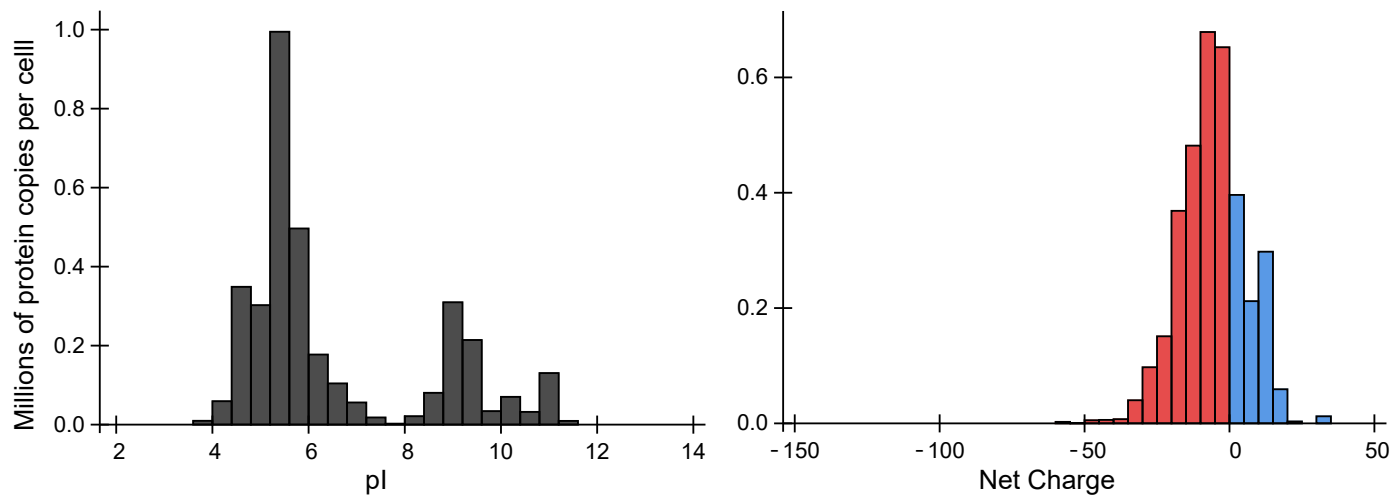

Supplement: supp [file elife-30084-supp-v1.zip › elife_poa_e30084_Figure_7_figure_supplement_1.pdf]

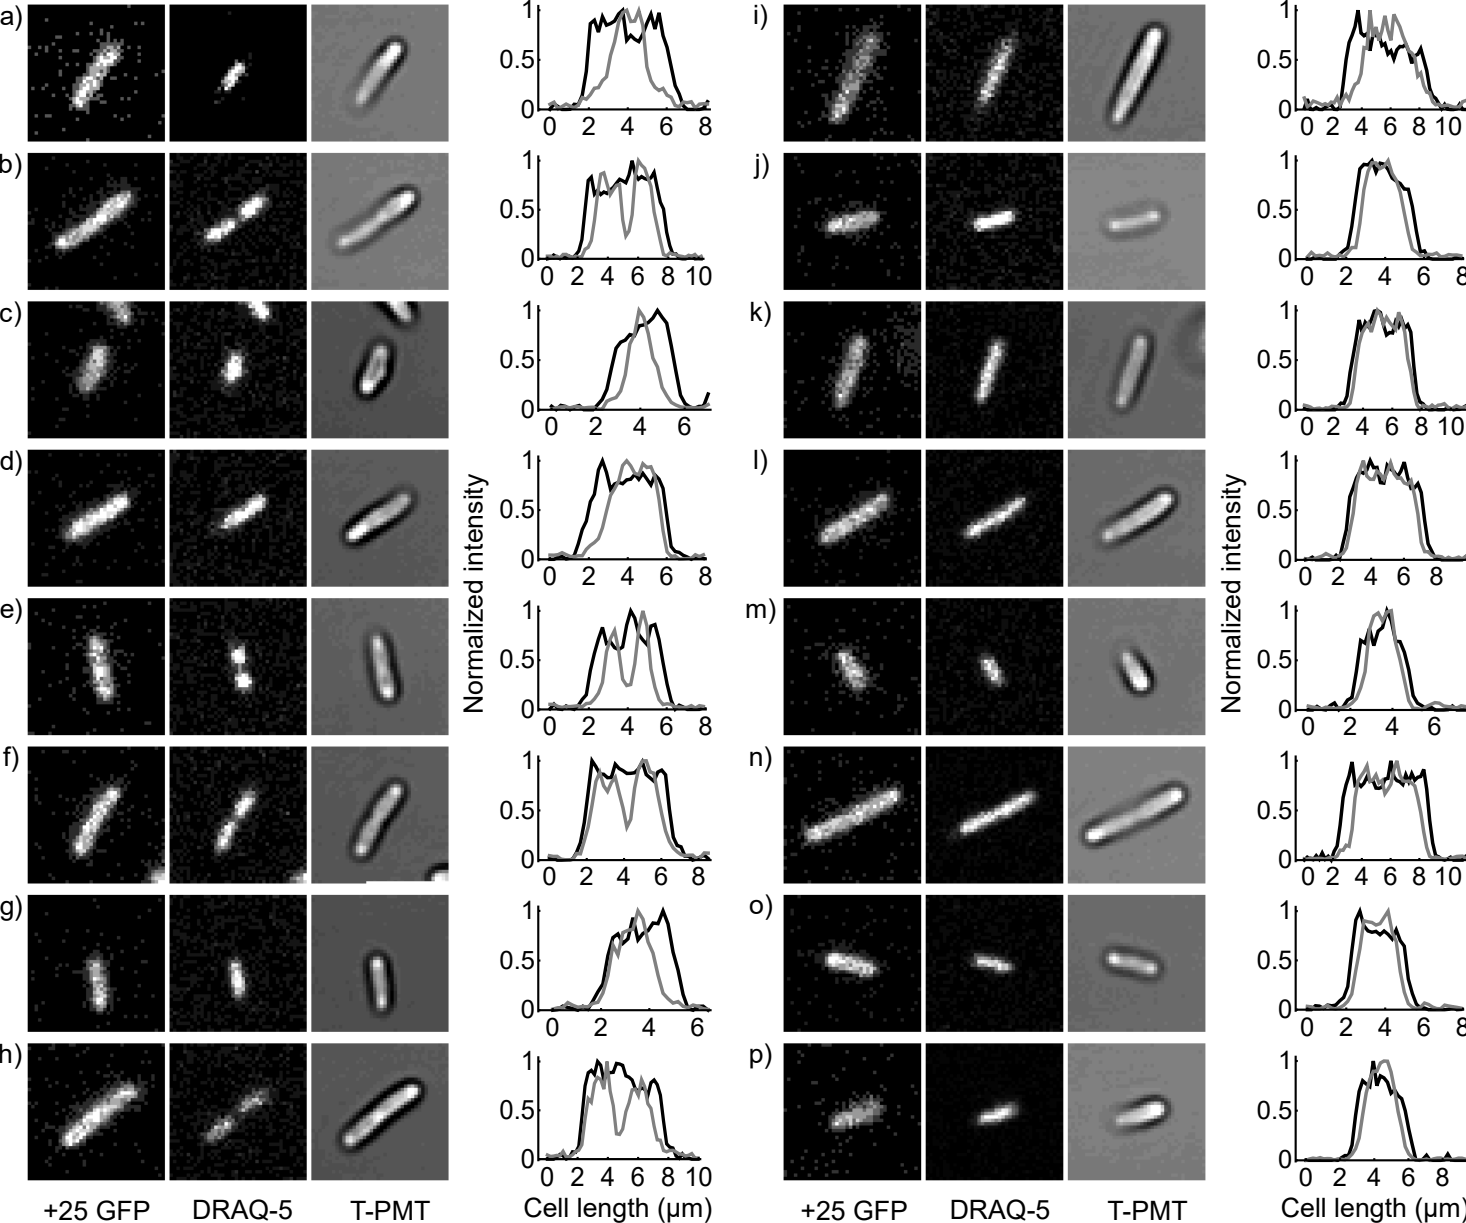

Supplement: supp [file elife-30084-supp-v1.zip › elife_poa_e30084_Figure_4_figure_supplement_1.pdf]

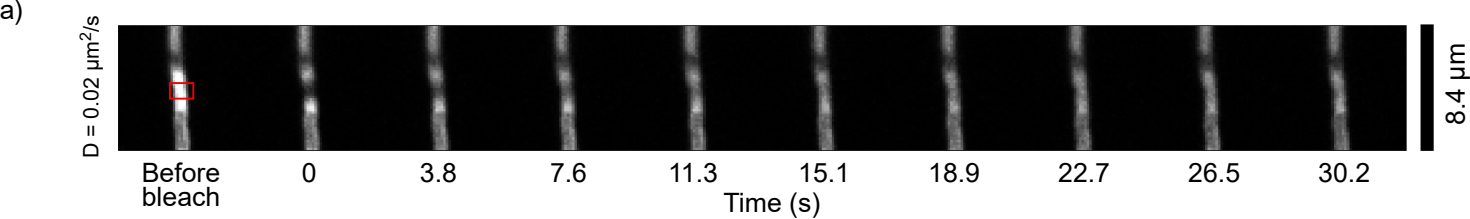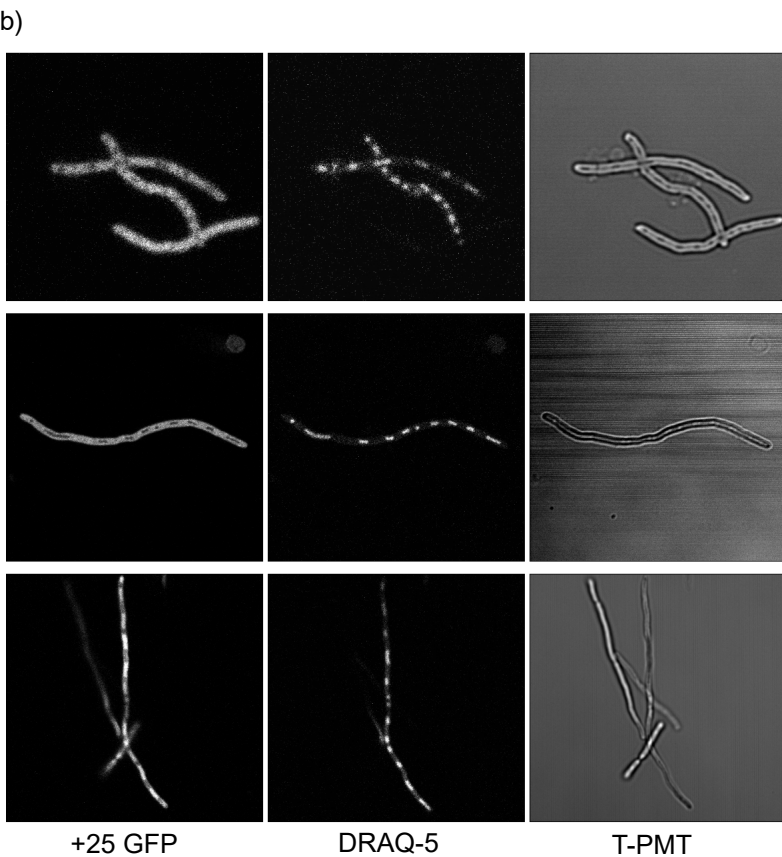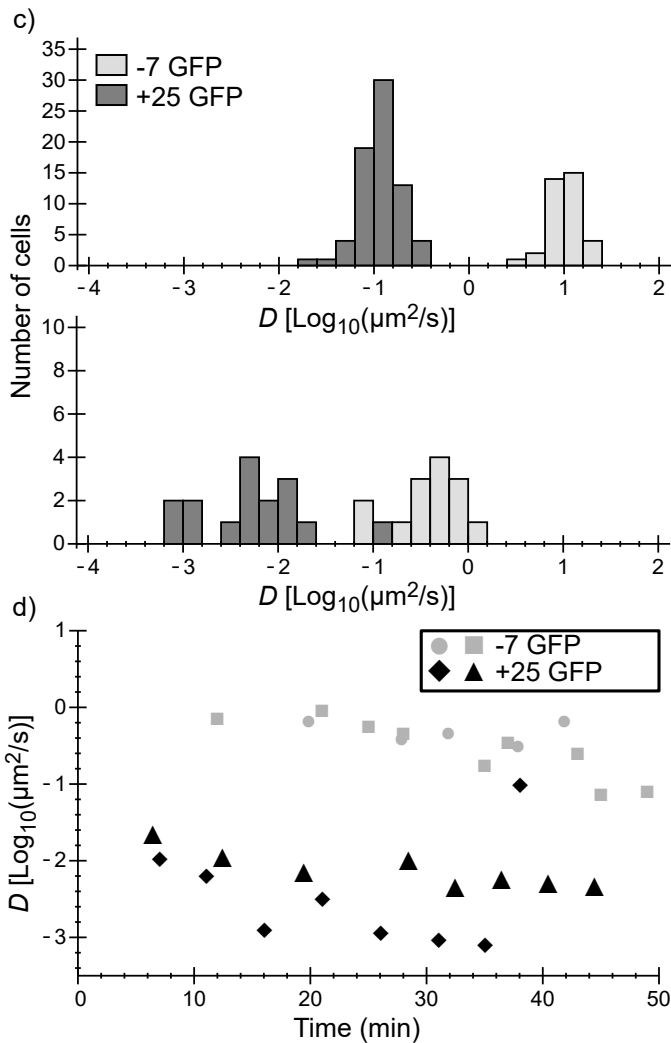

Supplement: supp [file elife-30084-supp-v1.zip › elife_poa_e30084_Figure_4_figure_supplement_2.pdf]

a)

Top to bottom GFP variant:

+11b, +7, +15, +11a, +25

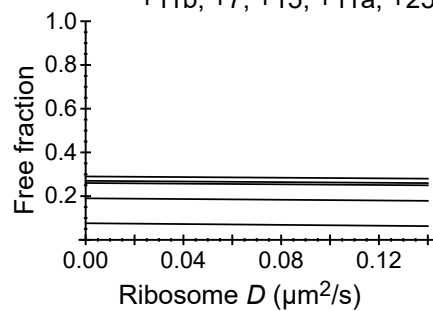

+15, +25

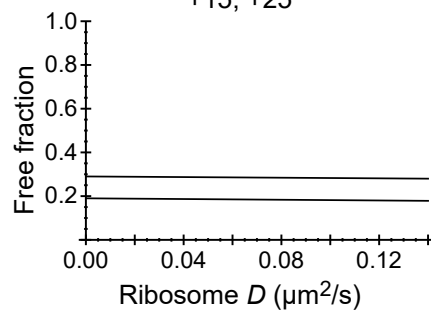

-7, +15, +25

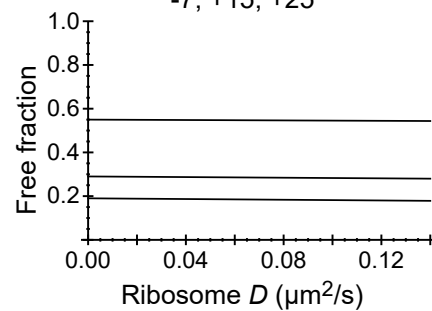

b)

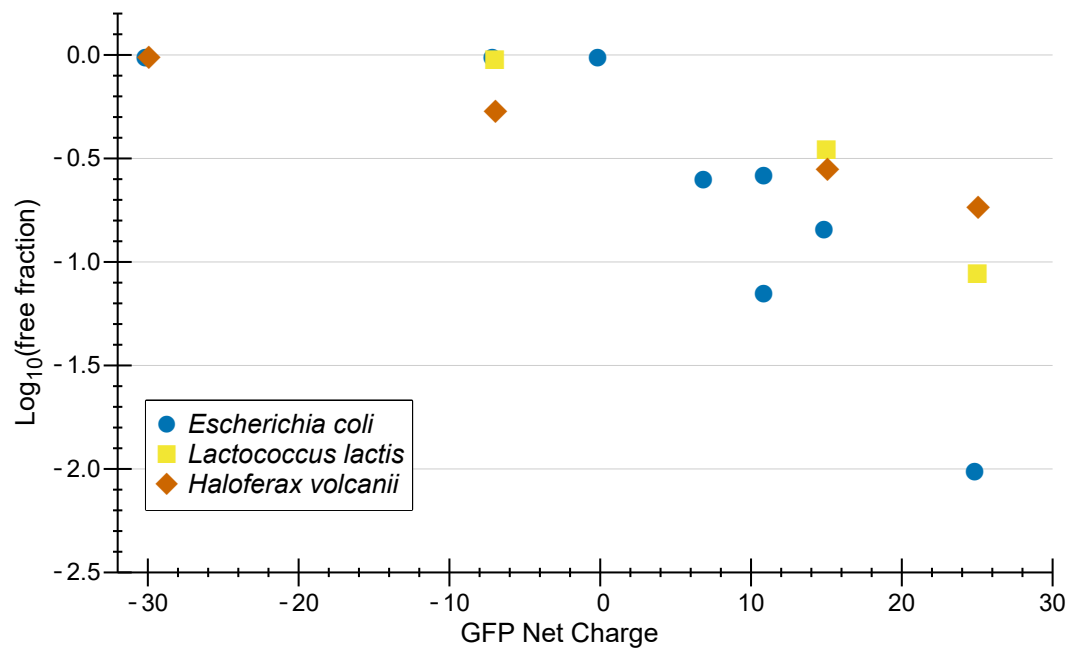

Supplement: supp [file elife-30084-supp-v1.zip › elife_poa_e30084_Figure_6_figure_supplement_1.pdf]
